# Supplementary material for: Statins can suppress DC‐mediated Th2 responses through the repression of OX40‐ligand and CCL17 expression
Source: PubMed Central journal article supplement — Eur J Immunol. 2019 Jul 11;49(11):2051–62. doi: 10.1002/eji.201847992 (PMC6899642; doi:10.1002/eji.201847992), 2019-07-11
Supplement: EJI-49-2051-s001.pdf [file EJI-49-2051-s001.pdf]

# European Journal of Immunology

Supporting Information

for

**DOI 10.1002/eji.201847992**

Noriko Inagaki-Katashiba, Tomoki Ito, Muneo Inaba, Yoshiko Azuma,  
Akihiro Tanaka, Vien Phan, Kayoko Kibata, Atsushi Satake and Shosaku Nomura

**Statins can suppress DC-mediated Th2 responses through the repression of  
OX40-ligand and CCL17 expression**

## Supplementary Figure S1

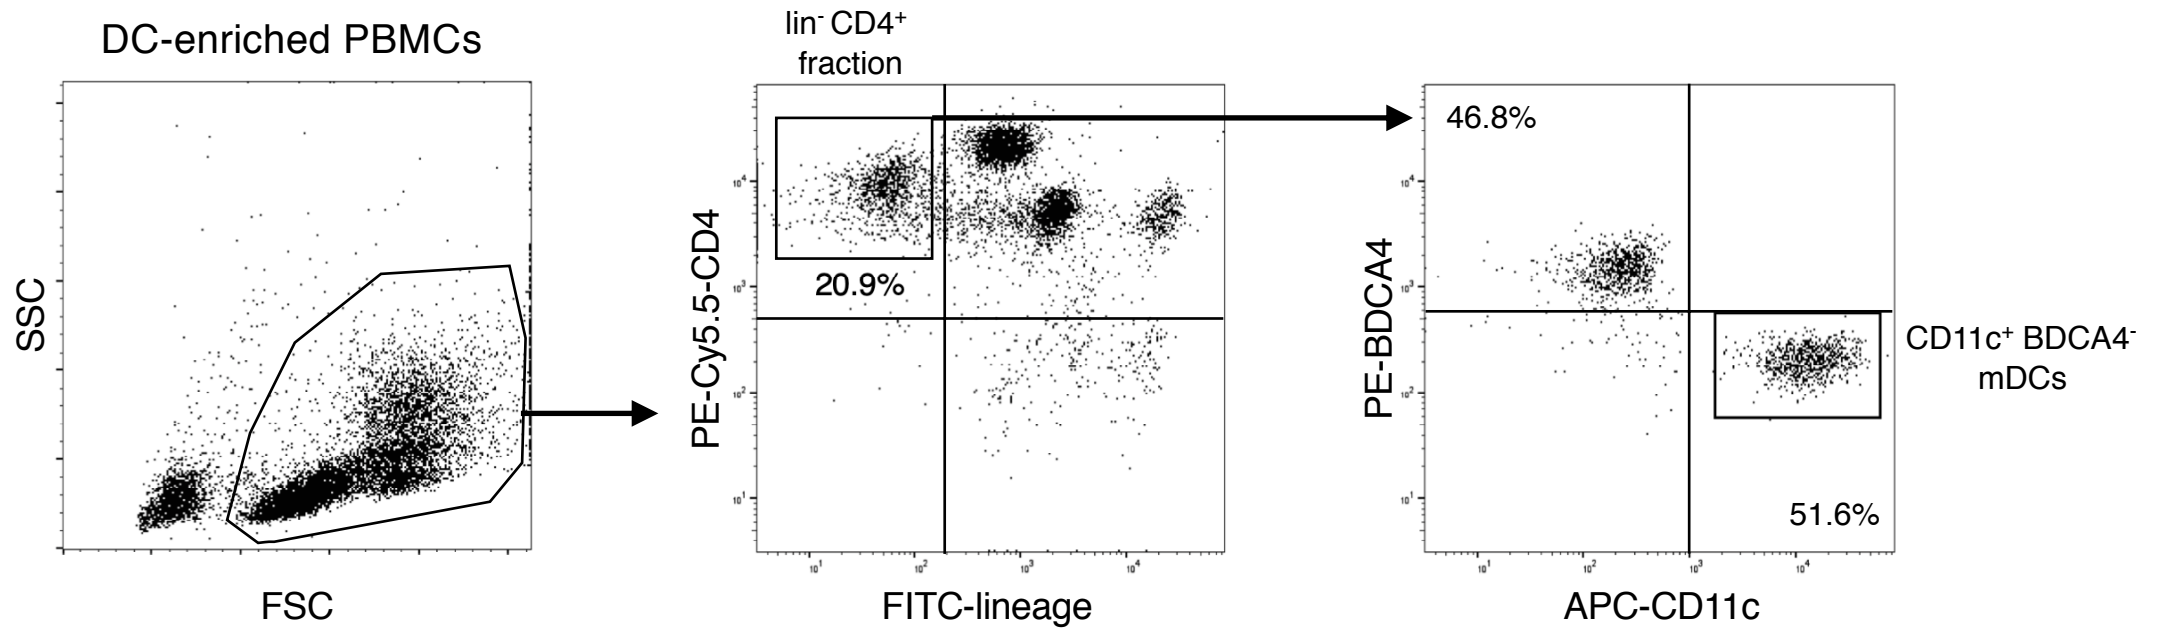

### Supplementary Figure S1. Isolation of blood mDCs.

Blood mDCs were detected and isolated as CD11c-positive and BDCA-4-negative population in the lineage (CD3, CD14, CD15, CD16, CD19, and CD56)-negative and CD4-positive fraction in DC-enriched PBMCs after immunobeads-selection methods (CD3- and CD14-beads negative selection and subsequent CD4-beads positive selection) from the total PBMCs. A representative FACS analysis to detect mDCs in PBMCs from ten healthy donors was shown. Indicated numbers are the percentages of gated fraction.

FSC; forward scatter, SSC; side scatter.
